# Supplementary material
Source: HighWire-hosted journal article supplement (http://jech.bmjjournals.com/highwire/filestream/159211/field_highwire_adjunct_files/0/Suppl.pdf)
Supplement: Suppl.pdf [file Suppl.pdf]

**Supplementary Web-Table 1.** Distribution of outcomes and confounders in participants with data on outcomes who were excluded from the analyses due to missing data on exposures or confounders and in complete cases. (3177 participants were excluded due to reported special education needs at any school year ).

| Variable                         | N of excluded participants | Mean (SD) in excluded participants | Mean (SD) in complete cases (n=3171) | P for difference |
|----------------------------------|----------------------------|------------------------------------|--------------------------------------|------------------|
| English total score              | 7123                       | 47.43 (15.25)                      | 53.29 (14.91)                        | <0.001           |
| Maths total score                | 7123                       | 81.64 (20.49)                      | 88.61 (20.43)                        | <0.001           |
| Science total score              | 7123                       | 98.59 (23.21)                      | 101.93 (22.15)                       | <0.001           |
| BMI (kg/m <sup>2</sup> )         | 1446                       | 17.57 (3.65)                       | 17.33 (3.29)                         | 0.03             |
| Full WISC-III IQ at age 8.5years | 1734                       | 101.45 (18.97)                     | 105.12 (20.49)                       | <0.001           |

  

| Variable                                              | N of excluded participants | N (%) in excluded participants | N (%) in complete cases (n=3171) | P for difference |
|-------------------------------------------------------|----------------------------|--------------------------------|----------------------------------|------------------|
| Achieved 5 or more A*-C grades                        | 7123                       |                                |                                  |                  |
| No                                                    |                            | 3209 (45.1)                    | 795 (25.1)                       |                  |
| Yes                                                   |                            | 3914 (54.9)                    | 2376 (74.9)                      | <0.001           |
| Achieved 9 or more A*-A grades                        | 7123                       |                                |                                  |                  |
| No                                                    |                            | 6871 (96.5)                    | 2895 (91.3)                      |                  |
| Yes                                                   |                            | 252 (3.5)                      | 276 (8.7)                        | <0.001           |
| Did not achieve any A*-C grades                       | 7123                       |                                |                                  |                  |
| No                                                    |                            | 6224 (87.4)                    | 3018 (95.2)                      |                  |
| Yes                                                   |                            | 899 (12.6)                     | 153 (4.8)                        | <0.001           |
| Ethnicity                                             | 4701                       |                                |                                  |                  |
| White                                                 |                            | 4431 (94.3)                    | 3071 (96.9)                      |                  |
| Non-white                                             |                            | 270 (5.7)                      | 100 (3.1)                        | <0.001           |
| Eligible for free school meals                        | 7119                       |                                |                                  |                  |
| No                                                    |                            | 6307 (88.6)                    | 3048 (96.1)                      |                  |
| Yes                                                   |                            | 812 (11.4)                     | 123 (3.9)                        | <0.001           |
| Time spent outdoors in summer during holidays >3h/day | 1747                       |                                |                                  |                  |

|                                                                        |                 |      |             |             |        |
|------------------------------------------------------------------------|-----------------|------|-------------|-------------|--------|
|                                                                        | No              |      | 153 (8.8)   | 303 (9.6)   |        |
|                                                                        | Yes             |      | 1594 (91.2) | 2868 (90.4) | 0.35   |
| Time spent outdoors in summer during weekends >3h/day                  |                 | 1735 |             |             |        |
|                                                                        | No              |      | 137 (7.9)   | 267 (8.4)   |        |
|                                                                        | Yes             |      | 1598 (92.1) | 2904 (91.6) | 0.51   |
| Time spent outdoors in summer during school weekdays >3h/day           |                 | 1780 |             |             |        |
|                                                                        | No              |      | 832 (46.7)  | 1651 (52.1) |        |
|                                                                        | Yes             |      | 948 (53.3)  | 1520 (47.9) | <0.001 |
| Child normally wears something to cover the skin whilst out in the sun |                 | 1758 |             |             |        |
|                                                                        | Always          |      | 331 (18.8)  | 440 (13.9)  |        |
|                                                                        | Usually         |      | 763 (43.4)  | 1426 (45.0) |        |
|                                                                        | Sometimes/Never |      | 664 (37.8)  | 1305 (41.2) |        |
| Child normally uses sunblock whilst out in the sun                     |                 | 1770 |             |             | <0.001 |
|                                                                        | Always          |      | 1017 (57.5) | 1737 (54.8) |        |
|                                                                        | Usually         |      | 540 (30.5)  | 1043 (32.9) |        |
|                                                                        | Sometimes/Never |      | 213 (12.0)  | 391 (12.3)  |        |
| Child normally wears hat whilst out in the sun                         |                 | 1763 |             |             | 0.10   |
|                                                                        | Always          |      | 331 (18.8)  | 440 (13.9)  |        |
|                                                                        | Usually         |      | 664 (37.8)  | 1305 (41.2) |        |
|                                                                        | Sometimes       |      | 1017 (57.5) | 1737 (54.8) |        |
|                                                                        | Never           |      | 78 (4.4)    | 156 (4.9)   | 0.001  |
| Child normally avoids midday sun                                       |                 | 1755 |             |             |        |
|                                                                        | Always          |      | 306 (17.4)  | 457 (14.4)  |        |
|                                                                        | Usually         |      | 707 (40.3)  | 1251 (39.5) |        |
|                                                                        | Sometimes       |      | 603 (34.4)  | 1193 (37.6) |        |
|                                                                        | Never           |      | 139 (7.9)   | 269 (8.5)   | 0.003  |

|                                |                |      |             |             |        |
|--------------------------------|----------------|------|-------------|-------------|--------|
| Head of household social class |                | 3369 |             |             |        |
|                                | i              |      | 298 (8.8)   | 450 (14.2)  |        |
|                                | ii             |      | 1296 (38.5) | 1480 (46.7) |        |
|                                | iii non-manual |      | 1011 (30.0) | 834 (26.3)  |        |
|                                | iii manual     |      | 531 (15.8)  | 299 (9.4)   |        |
|                                | iv/v           |      | 298 (8.8)   | 450 (14.2)  | <0.001 |
| Paternal education level       |                | 3503 |             |             |        |
|                                | None/CSE       |      | 1038 (29.6) | 542 (17.1)  |        |
|                                | Vocational     |      | 321 (9.2)   | 267 (8.4)   |        |
|                                | O level        |      | 808 (23.1)  | 769 (24.3)  |        |
|                                | A level        |      | 919 (26.2)  | 945 (29.8)  |        |
|                                | Degree         |      | 417 (11.9)  | 648 (20.4)  | <0.001 |
| Maternal education level       |                | 3727 |             |             |        |
|                                | None/CSE       |      | 876 (23.5)  | 348 (11.0)  |        |
|                                | Vocational     |      | 419 (11.2)  | 257 (8.1)   |        |
|                                | O level        |      | 1432 (38.4) | 1207 (38.1) |        |
|                                | A level        |      | 707 (19.0)  | 887 (28.0)  |        |
|                                | Degree         |      | 293 (7.9)   | 471 (14.9)  | <0.001 |

**Supplementary Web-Table 2.** Univariable associations between potential confounders and age- and gender-adjusted serum 25-hydroxyvitamin D<sub>3</sub>, D<sub>2</sub>, PTH and calcium concentrations

|                                | Season-adjusted<br>25(OH)D <sub>3</sub> (nmol/L)     |          | 25(OH)D <sub>2</sub> (nmol/L)                     |          | Phosphate (mmol/L)                                |          | Albumin-adjusted<br>calcium (mmol/L)              |          | Parathyroid hormone<br>pmol/L                     |          |
|--------------------------------|------------------------------------------------------|----------|---------------------------------------------------|----------|---------------------------------------------------|----------|---------------------------------------------------|----------|---------------------------------------------------|----------|
|                                | SD change<br>per<br>SD/category<br>change<br>(95%CI) | <i>P</i> | SD change per<br>SD/category<br>change<br>(95%CI) | <i>P</i> |
| BMI (kg/m <sup>2</sup> )       | -0.02<br>(-0.03, -0.01)                              | <0.001   | -0.01<br>(-0.02, -0.01)                           | 0.001    | 0.00<br>(-0.01, 0.01)                             | 0.99     | 0.00<br>(-0.01, 0.01)                             | 0.53     | 0.02<br>(0.01, 0.02)                              | <0.001   |
| Non-white<br>ethnicity         | -0.67<br>(-0.79, -0.56)                              | <0.001   | -0.09<br>(-0.21, 0.02)                            | 0.11     | -0.02<br>(-0.14, 0.10)                            | 0.76     | -0.07<br>(-0.18, 0.05)                            | 0.28     | 0.34<br>(0.22, 0.46)                              | <0.001   |
| Head of household social class |                                                      |          |                                                   |          |                                                   |          |                                                   |          |                                                   |          |
| i                              | 0.02<br>(-0.05, 0.08)                                | 0.002    | -0.04<br>(-0.10, 0.02)                            | 0.02     | 0.04<br>(-0.03, 0.10)                             | 0.01     | -0.05<br>(-0.12, 0.01)                            | 0.16     | -0.01<br>(-0.07, 0.06)                            | 0.58     |
| ii                             | 0.04<br>(-0.03, 0.11)                                |          | 0.02<br>(-0.05, 0.10)                             |          | 0.00<br>(-0.08, 0.07)                             |          | 0.07<br>(-0.01, 0.14)                             |          | 0.01<br>(-0.07, 0.08)                             |          |
| iii non-manual                 | -0.01<br>(-0.09, 0.07)                               |          | 0.03<br>(-0.05, 0.12)                             |          | -0.07<br>(-0.15, 0.01)                            |          | 0.09<br>(0.00, 0.17)                              |          | -0.04<br>(-0.12, 0.05)                            |          |
| iii manual                     | -0.15<br>(-0.25, -0.04)                              |          | 0.15<br>(0.04, 0.25)                              |          | -0.12<br>(-0.23, -0.01)                           |          | 0.02<br>(-0.08, 0.13)                             |          | 0.06<br>(-0.05, 0.17)                             |          |
| iv/v                           | -0.10<br>(-0.25, 0.05)                               |          | 0.07<br>(-0.08, 0.23)                             |          | -0.04<br>(-0.20, 0.11)                            |          | 0.14<br>(-0.02, 0.29)                             |          | 0.05<br>(-0.10, 0.20)                             |          |
| Paternal education             |                                                      |          |                                                   |          |                                                   |          |                                                   |          |                                                   |          |
| None/CSE                       | -0.05<br>(-0.11, 0.01)                               | 0.11     | 0.08<br>(0.02, 0.14)                              | 0.02     | -0.0<br>3(-0.09, 0.03)                            | 0.14     | 0.11<br>(0.05, 0.17)                              | 0.001    | -0.02<br>(-0.08, 0.04)                            | 0.94     |
| Vocational                     | 0.07<br>(-0.04, 0.18)                                |          | -0.18<br>(-0.29, -0.06)                           |          | 0.03<br>(-0.08, 0.14)                             |          | -0.15<br>(-0.26, -0.04)                           |          | 0.00<br>(-0.11, 0.11)                             |          |
| O level                        | 0.09<br>(0.01, 0.18)                                 |          | -0.09<br>(-0.17, -0.01)                           |          | 0.03<br>(-0.05, 0.12)                             |          | -0.09<br>(-0.17, 0.00)                            |          | 0.05<br>(-0.04, 0.13)                             |          |
| A level                        | 0.11                                                 |          | -0.07                                             |          | 0.02                                              |          | -0.08                                             |          | -0.01                                             |          |

|                                                                        |                |       |                |       |                |      |                |       |               |      |
|------------------------------------------------------------------------|----------------|-------|----------------|-------|----------------|------|----------------|-------|---------------|------|
|                                                                        | (0.03, 0.18)   |       | (-0.15, 0.01)  |       | (-0.06, 0.10)  |      | (-0.16, 0.00)  |       | (-0.08, 0.07) |      |
|                                                                        | 0.06           |       | -0.14          |       | 0.07           |      | -0.18          |       | 0.01          |      |
| Maternal education                                                     | (-0.02, 0.14)  |       | (-0.22, -0.05) |       | (-0.01, 0.15)  |      | (-0.26, -0.10) |       | (-0.07, 0.10) |      |
| None/CSE                                                               | -0.10          | 0.09  | 0.08           | 0.005 | -0.05          | 0.02 | 0.06           | 0.002 | 0.04          | 0.93 |
|                                                                        | (-0.17, -0.03) |       | (0.01, 0.16)   |       | (-0.13, 0.02)  |      | (-0.01, 0.13)  |       | (-0.04, 0.11) |      |
| Vocational                                                             | 0.11           |       | -0.10          |       | 0.10           |      | 0.02           |       | -0.07         |      |
|                                                                        | (0.00, 0.23)   |       | (-0.22, 0.02)  |       | (-0.02, 0.22)  |      | (-0.10, 0.13)  |       | (-0.18, 0.05) |      |
| O level                                                                | 0.15           |       | -0.06          |       | 0.02           |      | -0.04          |       | -0.07         |      |
|                                                                        | (0.07, 0.23)   |       | (-0.15, 0.02)  |       | (-0.07, 0.10)  |      | (-0.13, 0.04)  |       | (-0.16, 0.01) |      |
| A level                                                                | 0.10           |       | -0.12          |       | 0.07           |      | -0.06          |       | -0.03         |      |
|                                                                        | (0.02, 0.19)   |       | (-0.21, -0.04) |       | (-0.02, 0.16)  |      | (-0.15, 0.03)  |       | (-0.12, 0.05) |      |
| Degree                                                                 | 0.11           |       | -0.13          |       | 0.12           |      | -0.14          |       | -0.02         |      |
|                                                                        | (0.02, 0.21)   |       | (-0.22, -0.03) |       | (0.02, 0.21)   |      | (-0.24, -0.05) |       | (-0.12, 0.08) |      |
| Child normally wears hat whilst out in the sun                         |                |       |                |       |                |      |                |       |               |      |
| Always                                                                 | 0.04           | 0.001 | -0.02          | 0.51  | 0.01           | 0.61 | 0.10           | 0.003 | -0.07         | 0.02 |
|                                                                        | (-0.03, 0.10)  |       | (-0.09, 0.05)  |       | (-0.06, 0.08)  |      | (0.03, 0.17)   |       | (-0.14, 0.00) |      |
| Usually                                                                | 0.03           |       | 0.03           |       | -0.01          |      | -0.12          |       | 0.06          |      |
|                                                                        | (-0.05, 0.11)  |       | (-0.05, 0.11)  |       | (-0.09, 0.07)  |      | (-0.20, -0.04) |       | (-0.02, 0.14) |      |
| Sometimes                                                              | -0.07          |       | 0.01           |       | -0.02          |      | -0.13          |       | 0.08          |      |
|                                                                        | (-0.15, 0.01)  |       | (-0.07, 0.09)  |       | (-0.10, 0.07)  |      | (-0.21, -0.05) |       | (0.00, 0.16)  |      |
| Never                                                                  | -0.18          |       | 0.09           |       | -0.03          |      | -0.18          |       | 0.15          |      |
|                                                                        | (-0.32, -0.05) |       | (-0.04, 0.23)  |       | (-0.17, 0.10)  |      | (-0.32, -0.04) |       | (0.01, 0.28)  |      |
| Child normally wears something to cover the skin whilst out in the sun |                |       |                |       |                |      |                |       |               |      |
| Always                                                                 | 0.00           | 0.34  | -0.02          | 0.51  | -0.08          | 0.18 | 0.05           | 0.03  | -0.06         | 0.13 |
|                                                                        | (-0.07, 0.07)  |       | (-0.09, 0.05)  |       | (-0.15, -0.01) |      | (-0.02, 0.12)  |       | (-0.13, 0.01) |      |
| Usually                                                                | 0.01           |       | 0.04           |       | 0.10           |      | -0.04          |       | 0.06          |      |
|                                                                        | (-0.07, 0.09)  |       | (-0.04, 0.13)  |       | (0.01, 0.18)   |      | (-0.13, 0.04)  |       | (-0.03, 0.14) |      |
| Sometimes/                                                             | 0.03           |       | 0.00           |       | 0.08           |      | -0.09          |       | 0.07          |      |

|                                                              |                         |        |                        |       |                        |      |                        |      |                        |      |
|--------------------------------------------------------------|-------------------------|--------|------------------------|-------|------------------------|------|------------------------|------|------------------------|------|
| Never                                                        | (-0.05, 0.12)           |        | (-0.09, 0.08)          |       | (0.00, 0.17)           |      | (-0.17, 0.00)          |      | (-0.01, 0.16)          |      |
| Child normally uses sunblock whilst out in the sun           |                         |        |                        |       |                        |      |                        |      |                        |      |
| Always                                                       | 0.05<br>(0.01, 0.08)    | <0.001 | 0.00<br>(-0.04, 0.04)  | 0.67  | 0.00<br>(-0.04, 0.03)  | 0.68 | 0.02<br>(-0.02, 0.05)  | 0.46 | -0.01<br>(-0.05, 0.02) | 0.07 |
| Usually                                                      | -0.03<br>(-0.09, 0.03)  |        | -0.03<br>(-0.10, 0.03) |       | -0.01<br>(-0.07, 0.05) |      | -0.06<br>(-0.12, 0.00) |      | -0.02<br>(-0.08, 0.04) |      |
| Sometimes/<br>Never                                          | -0.18<br>(-0.27, -0.10) |        | 0.05<br>(-0.04, 0.14)  |       | 0.03<br>(-0.05, 0.12)  |      | 0.01<br>(-0.08, 0.10)  |      | 0.12<br>(0.03, 0.20)   |      |
| Child normally avoids midday sun                             |                         |        |                        |       |                        |      |                        |      |                        |      |
| Always                                                       | 0.01<br>(-0.06, 0.08)   | 0.46   | -0.02<br>(-0.09, 0.05) | 0.07  | -0.05<br>(-0.12, 0.02) | 0.03 | 0.03<br>(-0.04, 0.10)  | 0.78 | -0.02<br>(-0.09, 0.05) | 0.55 |
| Usually                                                      | -0.04<br>(-0.12, 0.05)  |        | 0.04<br>(-0.04, 0.13)  |       | 0.05<br>(-0.03, 0.13)  |      | -0.05<br>(-0.13, 0.04) |      | 0.04<br>(-0.04, 0.12)  |      |
| Sometimes                                                    | 0.04<br>(-0.04, 0.13)   |        | 0.00<br>(-0.08, 0.09)  |       | 0.09<br>(0.00, 0.17)   |      | -0.03<br>(-0.12, 0.05) |      | -0.01<br>(-0.09, 0.08) |      |
| Never                                                        | 0.08<br>(-0.04, 0.20)   |        | 0.02<br>(-0.10, 0.14)  |       | -0.04<br>(-0.16, 0.08) |      | -0.01<br>(-0.13, 0.11) |      | -0.02<br>(-0.14, 0.10) |      |
| Time spent outdoors in summer during school weekdays >3h/day |                         |        |                        |       |                        |      |                        |      |                        |      |
| Time spent outdoors in summer during weekends >3h/day        | 0.03<br>(-0.03, 0.08)   | 0.31   | 0.01<br>(-0.04, 0.07)  | 0.66  | 0.02<br>(-0.03, 0.08)  | 0.40 | 0.04<br>(-0.02, 0.10)  | 0.16 | -0.02<br>(-0.08, 0.03) | 0.39 |
| Time spent outdoors in summer during holidays >3h/day        |                         |        |                        |       |                        |      |                        |      |                        |      |
| Time spent outdoors in summer during weekends >3h/day        | 0.22<br>(0.12, 0.31)    | <0.001 | 0.08<br>(-0.02, 0.18)  | 0.112 | 0.04<br>(-0.05, 0.14)  | 0.40 | 0.05<br>(-0.04, 0.15)  | 0.29 | -0.03<br>(-0.13, 0.06) | 0.51 |
| Time spent outdoors in summer during holidays >3h/day        | 0.25<br>(0.16, 0.34)    | <0.001 | 0.09<br>(0.00, 0.18)   | 0.06  | 0.01<br>(-0.08, 0.10)  | 0.79 | 0.01<br>(-0.09, 0.10)  | 0.90 | -0.02<br>(-0.12, 0.07) | 0.60 |

---

|                                   |                         |        |                      |      |                       |      |                       |      |                       |      |
|-----------------------------------|-------------------------|--------|----------------------|------|-----------------------|------|-----------------------|------|-----------------------|------|
| Eligible for free<br>school meals | -0.31<br>(-0.41, -0.21) | <0.001 | 0.13<br>(0.03, 0.23) | 0.01 | 0.07<br>(-0.04, 0.17) | 0.22 | 0.08<br>(-0.02, 0.19) | 0.11 | 0.10<br>(-0.01, 0.20) | 0.06 |
|-----------------------------------|-------------------------|--------|----------------------|------|-----------------------|------|-----------------------|------|-----------------------|------|

**Supplementary Web-Table 3.** Univariable associations between potential confounders and KS3 scores

|                                                | English total score                      |          | Maths total score                        |          | Science total score                      |          |
|------------------------------------------------|------------------------------------------|----------|------------------------------------------|----------|------------------------------------------|----------|
|                                                | SD change per SD/category change (95%CI) | <i>P</i> | SD change per SD/category change (95%CI) | <i>P</i> | SD change per SD/category change (95%CI) | <i>P</i> |
| BMI (kg/m <sup>2</sup> )                       | -0.01 (-0.02, 0.00)                      | 0.04     | 0.00 (-0.01, 0.01)                       | 0.59     | -0.02 (-0.03, -0.01)                     | 0.001    |
| Non-white ethnicity                            | -0.08 (-0.18, 0.02)                      | 0.11     | -0.16 (-0.26, -0.06)                     | 0.002    | -0.12 (-0.22, -0.02)                     | 0.02     |
| Head of household social class                 |                                          |          |                                          |          |                                          |          |
| i                                              | 0.71 (0.64, 0.77)                        | <0.001   | 0.31 (0.24, 0.38)                        | <0.001   | 0.59 (0.53, 0.66)                        | <0.001   |
| ii                                             | -0.47 (-0.54, -0.39)                     |          | -0.23 (-0.31, -0.15)                     |          | -0.41 (-0.49, -0.34)                     |          |
| iii non-manual                                 | -0.74 (-0.82, -0.66)                     |          | -0.32 (-0.40, -0.24)                     |          | -0.63 (-0.72, -0.55)                     |          |
| iii manual                                     | -0.99 (-1.08, -0.90)                     |          | -0.40 (-0.50, -0.31)                     |          | -0.77 (-0.87, -0.68)                     |          |
| iv/v                                           | -1.17 (-1.29, -1.06)                     |          | -0.40 (-0.52, -0.27)                     |          | -0.90 (-1.02, -0.78)                     |          |
| Paternal education                             |                                          |          |                                          |          |                                          |          |
| None/CSE                                       | -0.30 (-0.34, -0.25)                     | <0.001   | -0.06 (-0.11, -0.01)                     | <0.001   | -0.23 (-0.28, -0.18)                     | <0.001   |
| Vocational                                     | 0.12 (0.03, 0.20)                        |          | 0.04 (-0.05, 0.13)                       |          | 0.08 (-0.01, 0.17)                       |          |
| O level                                        | 0.40 (0.33, 0.46)                        |          | 0.07 (0.00, 0.14)                        |          | 0.30 (0.24, 0.37)                        |          |
| A level                                        | 0.48 (0.41, 0.54)                        |          | 0.13 (0.07, 0.19)                        |          | 0.35 (0.29, 0.42)                        |          |
| Degree                                         | 1.10 (1.03, 1.17)                        |          | 0.35 (0.28, 0.43)                        |          | 0.91 (0.84, 0.98)                        |          |
| Maternal education                             |                                          |          |                                          |          |                                          |          |
| None/CSE                                       | -0.39 (-0.44, -0.34)                     | <0.001   | -0.10 (-0.15, -0.04)                     | <0.001   | -0.27 (-0.32, -0.21)                     | <0.001   |
| Vocational                                     | 0.18 (0.09, 0.26)                        |          | 0.06 (-0.03, 0.15)                       |          | 0.09 (0.01, 0.18)                        |          |
| O level                                        | 0.40 (0.34, 0.46)                        |          | 0.09 (0.03, 0.16)                        |          | 0.29 (0.23, 0.35)                        |          |
| A level                                        | 0.75 (0.69, 0.82)                        |          | 0.22 (0.15, 0.30)                        |          | 0.52 (0.45, 0.58)                        |          |
| Degree                                         | 1.22 (1.14, 1.30)                        |          | 0.46 (0.37, 0.54)                        |          | 0.98 (0.90, 1.07)                        |          |
| Child normally wears hat whilst out in the sun |                                          |          |                                          |          |                                          |          |
| Always                                         | 0.07 (0.01, 0.14)                        | 0.02     | 0.10 (0.04, 0.16)                        | 0.60     | 0.11 (0.05, 0.18)                        | 0.93     |
| Usually                                        | 0.13 (0.05, 0.21)                        |          | -0.02 (-0.10, 0.05)                      |          | 0.07 (-0.01, 0.14)                       |          |



|                                                                        |                      |        |                      |        |                      |        |
|------------------------------------------------------------------------|----------------------|--------|----------------------|--------|----------------------|--------|
| Sometimes                                                              | 0.14 (0.06, 0.22)    |        | -0.02 (-0.10, 0.06)  |        | 0.07 (-0.01, 0.14)   |        |
| Never                                                                  | 0.06 (-0.08, 0.20)   |        | -0.04 (-0.18, 0.10)  |        | -0.11 (-0.25, 0.03)  |        |
| Child normally wears something to cover the skin whilst out in the sun |                      |        |                      |        |                      |        |
| Always                                                                 | 0.02 (-0.05, 0.08)   | 0.001  | 0.04 (-0.02, 0.11)   | 0.50   | 0.06 (-0.01, 0.13)   | 0.35   |
| Usually                                                                | 0.20 (0.12, 0.28)    |        | 0.04 (-0.04, 0.12)   |        | 0.15 (0.07, 0.23)    |        |
| Sometimes/Never                                                        | 0.18 (0.10, 0.26)    |        | 0.04 (-0.04, 0.12)   |        | 0.08 (0.00, 0.16)    |        |
| Child normally uses sunblock whilst out in the sun                     |                      |        |                      |        |                      |        |
| Always                                                                 | 0.15 (0.11, 0.19)    | 0.50   | 0.07 (0.03, 0.10)    | 0.38   | 0.12 (0.08, 0.15)    | 0.01   |
| Usually                                                                | 0.11 (0.05, 0.17)    |        | 0.03 (-0.03, 0.09)   |        | 0.11 (0.05, 0.17)    |        |
| Sometimes/Never                                                        | -0.05 (-0.13, 0.04)  |        | 0.02 (-0.06, 0.11)   |        | 0.05 (-0.04, 0.14)   |        |
| Child normally avoids midday sun                                       |                      |        |                      |        |                      |        |
| Always                                                                 | 0.20 (0.13, 0.27)    | <0.001 | 0.10 (0.03, 0.17)    | 0.08   | 0.10(0.03, 0.17)     | 0.13   |
| Usually                                                                | 0.06 (-0.02, 0.14)   |        | 0.01 (-0.07, 0.09)   |        | 0.13 (0.05, 0.21)    |        |
| Sometimes                                                              | -0.06 (-0.15, 0.02)  |        | -0.06 (-0.14, 0.03)  |        | 0.02 (-0.06, 0.11)   |        |
| Never                                                                  | -0.24 (-0.35, -0.12) |        | -0.05 (-0.17, 0.07)  |        | -0.03 (-0.15, 0.09)  |        |
| Time spent outdoors in summer during school weekdays >3h/day           |                      |        |                      |        |                      |        |
|                                                                        | -0.33 (-0.38, -0.27) | <0.001 | -0.11 (-0.17, -0.06) | <0.001 | -0.24 (-0.29, -0.18) | <0.001 |
| Time spent outdoors in summer during weekends >3h/day                  |                      |        |                      |        |                      |        |
|                                                                        | -0.35 (-0.45, -0.25) | <0.001 | -0.13 (-0.22, -0.03) | <0.001 | -0.29 (-0.39, -0.19) | <0.001 |
| Time spent outdoors in summer during                                   |                      |        |                      |        |                      |        |
|                                                                        | -0.33 (-0.42, -0.24) | <0.001 | -0.11 (-0.20, -0.01) | 0.03   | -0.26 (-0.35, -0.17) | <0.001 |

holidays >3h/day

Eligible for free  
school meals

-0.67 (-0.73, -0.62)

<0.001

-0.20 (-0.26, -0.14)

<0.001

-0.44 (-0.50, -0.38)

<0.001

---

**Supplementary Web-Table 4.** Univariable associations between potential confounders and KS4 outcomes

|                                                | Achieved 5 or more A*-C grades (including Maths and English) |          | Achieved 9 or more A*-A grades            |          | Did not achieve any A*-C grades           |          |
|------------------------------------------------|--------------------------------------------------------------|----------|-------------------------------------------|----------|-------------------------------------------|----------|
|                                                | SD change per SD/category change (95% CI)                    | <i>P</i> | SD change per SD/category change (95% CI) | <i>P</i> | SD change per SD/category change (95% CI) | <i>P</i> |
| BMI (kg/m <sup>2</sup> )                       | 0.97 (0.95, 0.99)                                            | 0.001    | 0.98 (0.94, 1.01)                         | 0.22     | 1.05 (1.01, 1.09)                         | 0.006    |
| Non-white ethnicity                            | 0.84 (0.69, 1.01)                                            | 0.07     | 1.27 (0.90, 1.78)                         | 0.18     | 1.07 (0.78, 1.46)                         | 0.69     |
| Head of household social class                 |                                                              |          |                                           |          |                                           |          |
| i                                              | 1 (reference)                                                | <0.001   | 1 (reference)                             | <0.001   | 1 (reference)                             | <0.001   |
| ii                                             | 0.50 (0.42, 0.61)                                            |          | 0.31 (0.26, 0.38)                         |          | 6.02 (2.95, 12.31)                        |          |
| iii non-manual                                 | 0.31 (0.26, 0.38)                                            |          | 0.13 (0.09, 0.17)                         |          | 10.54 (5.16, 21.51)                       |          |
| iii manual                                     | 0.17 (0.14, 0.21)                                            |          | 0.03 (0.02, 0.07)                         |          | 21.39 (10.42, 43.91)                      |          |
| iv/v                                           | 0.11 (0.08, 0.14)                                            |          | 0.06 (0.03, 0.13)                         |          | 34.11 (16.32, 71.30)                      |          |
| Paternal education                             |                                                              |          |                                           |          |                                           |          |
| None/CSE                                       | 1 (reference)                                                | <0.001   | 1 (reference)                             | <0.001   | 1 (reference)                             | <0.001   |
| Vocational                                     | 1.47 (1.23, 1.76)                                            |          | 0.92 (0.45, 1.90)                         |          | 0.63 (0.48, 0.84)                         |          |
| O level                                        | 2.50 (2.18, 2.87)                                            |          | 2.27 (1.46, 3.54)                         |          | 0.37 (0.29, 0.46)                         |          |
| A level                                        | 3.03 (2.65, 3.45)                                            |          | 3.91 (2.60, 5.88)                         |          | 0.31 (0.25, 0.39)                         |          |
| Degree                                         | 6.82 (5.73, 8.11)                                            |          | 18.26 (12.39, 26.91)                      |          | 0.05 (0.03, 0.09)                         |          |
| Maternal education                             |                                                              |          |                                           |          |                                           |          |
| None/CSE                                       | 1 (reference)                                                | <0.001   | 1 (reference)                             | <0.001   | 1 (reference)                             | <0.001   |
| Vocational                                     | 1.45 (1.22, 1.74)                                            |          | 1.25 (0.58, 2.71)                         |          | 0.59 (0.46, 0.77)                         |          |
| O level                                        | 2.37 (2.08, 2.71)                                            |          | 2.88 (1.69, 4.90)                         |          | 0.37 (0.30, 0.44)                         |          |
| A level                                        | 4.60 (3.96, 5.36)                                            |          | 8.50 (5.07, 14.25)                        |          | 0.13 (0.10, 0.18)                         |          |
| Degree                                         | 8.37 (6.80, 10.30)                                           |          | 30.40 (18.21, 50.77)                      |          | 0.06 (0.03, 0.11)                         |          |
| Child normally wears hat whilst out in the sun |                                                              |          |                                           |          |                                           |          |

|                                                                        |                 |                   |        |                   |        |                   |        |
|------------------------------------------------------------------------|-----------------|-------------------|--------|-------------------|--------|-------------------|--------|
|                                                                        | Always          | 1 (reference)     | <0.001 | 1 (reference)     | 0.25   | 1 (reference)     | 0.10   |
|                                                                        | Usually         | 1.51 (1.29, 1.76) |        | 1.12 (0.86, 1.47) |        | 0.78 (0.58, 1.05) |        |
|                                                                        | Sometimes       | 1.43 (1.23, 1.68) |        | 1.11 (0.85, 1.46) |        | 0.89 (0.66, 1.20) |        |
|                                                                        | Never           | 1.00 (0.76, 1.30) |        | 0.70 (0.40, 1.22) |        | 1.41 (0.89, 2.25) |        |
| Child normally wears something to cover the skin whilst out in the sun |                 |                   |        |                   |        |                   |        |
|                                                                        | Always          | 1 (reference)     | <0.001 | 1 (reference)     | 0.06   | 1 (reference)     | 0.002  |
|                                                                        | Usually         | 1.59 (1.35, 1.86) |        | 1.45 (1.07, 1.98) |        | 0.54 (0.41, 0.72) |        |
|                                                                        | Sometimes/Never | 1.36 (1.16, 1.60) |        | 1.49 (1.09, 2.04) |        | 0.61 (0.46, 0.82) |        |
| Child normally uses sunblock whilst out in the sun                     |                 |                   |        |                   |        |                   |        |
|                                                                        | Always          | 1 (reference)     | 0.03   | 1 (reference)     | 0.004  | 1 (reference)     | 0.17   |
|                                                                        | Usually         | 1.20 (1.06, 1.36) |        | 1.43 (1.17, 1.75) |        | 1.02 (0.80, 1.31) |        |
|                                                                        | Sometimes/Never | 0.98 (0.83, 1.17) |        | 0.98 (0.72, 1.34) |        | 1.43 (1.05, 1.95) |        |
| Child normally avoids midday sun                                       |                 |                   |        |                   |        |                   |        |
|                                                                        | Always          | 1 (reference)     | <0.001 | 1 (reference)     | 0.02   | 1 (reference)     | 0.001  |
|                                                                        | Usually         | 1.15 (0.97, 1.35) |        | 1.27 (0.96, 1.68) |        | 0.74 (0.53, 1.03) |        |
|                                                                        | Sometimes       | 1.01 (0.85, 1.19) |        | 0.97 (0.72, 1.30) |        | 1.04 (0.76, 1.44) |        |
|                                                                        | Never           | 0.71 (0.56, 0.90) |        | 0.79 (0.50, 1.23) |        | 1.62 (1.08, 2.44) |        |
| Time spent outdoors in summer during school weekdays >3h/day           |                 |                   |        |                   |        |                   |        |
|                                                                        |                 | 0.59 (0.53, 0.66) | <0.001 | 0.44 (0.36, 0.54) | <0.001 | 2.27 (1.81, 2.86) | <0.001 |
| Time spent outdoors in summer during weekends >3h/day                  |                 |                   |        |                   |        |                   |        |
|                                                                        |                 | 0.58 (0.46, 0.72) | <0.001 | 0.43 (0.33, 0.56) | <0.001 | 2.19 (1.30, 3.71) | 0.003  |
| Time spent outdoors in                                                 |                 |                   |        |                   |        |                   |        |
|                                                                        |                 | 0.60 (0.49, 0.74) | <0.001 | 0.49 (0.38, 0.64) | <0.001 | 2.90 (1.65, 5.08) | <0.001 |

---

|                                                                        |                   |        |                   |        |                   |        |
|------------------------------------------------------------------------|-------------------|--------|-------------------|--------|-------------------|--------|
| summer during<br>holidays >3h/day<br>Eligible for free<br>school meals | 0.24 (0.22, 0.28) | <0.001 | 0.09 (0.05, 0.18) | <0.001 | 5.06 (4.43, 5.79) | <0.001 |
|------------------------------------------------------------------------|-------------------|--------|-------------------|--------|-------------------|--------|

---

**Supplementary Web-Table 5.** Prospective association of unadjusted 25(OH)D<sub>3</sub> concentrations, assessed at mean age 9.8 years) with Key Stage 3 scores (assessed at age 13-14 years) and Key Stage 4 educational attainment (age 15-16 years) (n=3171)

| Outcome                                               | Model 1            | Model 2            | Model 3            |
|-------------------------------------------------------|--------------------|--------------------|--------------------|
| SD change in outcome per doubling of exposure (95%CI) |                    |                    |                    |
| English total score                                   | 0.02 (0.00, 0.04)  | 0.01 (-0.01, 0.03) | 0.01 (-0.01, 0.03) |
| Maths total score                                     | 0.01 (-0.01, 0.03) | 0.01 (-0.02, 0.03) | 0.01 (-0.02, 0.03) |
| Science total score                                   | 0.02 (0.00, 0.04)  | 0.02 (-0.01, 0.04) | 0.01 (-0.01, 0.04) |
| Odds ratio per doubling of exposure (95%CI)           |                    |                    |                    |
| Achieved 5 or more A*-C grades                        | 1.08 (1.02, 1.14)  | 1.07 (1.01, 1.13)  | 1.06 (1.00, 1.13)  |
| Achieved 9 or more A*-A grades                        | 1.05 (0.97, 1.13)  | 1.04 (0.96, 1.13)  | 1.02 (0.94, 1.12)  |
| Did not achieve any A*-C grades                       | 0.92 (0.83, 1.02)  | 0.93 (0.84, 1.03)  | 0.94 (0.84, 1.04)  |

Model 1 is unadjusted (25(OH)D concentrations exposures are standardised for age and gender)

Model 2 same as Model 1 plus adjustment for ethnicity, head of household social class, mothers and partners education, time spent outdoors during summer (age 8.5 years), use of sunblock, hat, covering clothing, avoidance of midday sun, BMI and eligibility for free school meals

Model 3 same as Model 2 plus adjustment for serum concentrations of phosphate, albumin-adjusted calcium and parathyroid hormone)

**Supplementary Web-Table 6.** Prospective association of total 25(OH)D (assessed at mean age 9.8 years) with Key Stage 3 scores (assessed at age 13-14 years) and Key Stage 4 educational attainment (age 15-16 years) (n=3171)

| Outcome                                               | Model 1            | Model 2            | Model 3            |
|-------------------------------------------------------|--------------------|--------------------|--------------------|
| SD change in outcome per doubling of exposure (95%CI) |                    |                    |                    |
| English total score                                   | 0.01 (-0.01, 0.03) | 0.01 (-0.01, 0.03) | 0.01 (-0.01, 0.03) |
| Maths total score                                     | 0.01 (-0.01, 0.03) | 0.01 (-0.02, 0.03) | 0.01 (-0.01, 0.03) |
| Science total score                                   | 0.01 (-0.01, 0.03) | 0.01 (-0.01, 0.03) | 0.01 (-0.01, 0.03) |
| Odds ratio per doubling of exposure (95%CI)           |                    |                    |                    |
| Achieved 5 or more A*-C grades                        | 1.05 (0.99, 1.11)  | 1.04 (0.98, 1.11)  | 1.05 (0.99, 1.11)  |
| Achieved 9 or more A*-A grades                        | 1.02 (0.95, 1.11)  | 1.02 (0.94, 1.11)  | 1.02 (0.94, 1.11)  |
| Did not achieve any A*-C grades                       | 0.93 (0.84, 1.04)  | 0.94 (0.84, 1.04)  | 0.93 (0.83, 1.04)  |

Model 1 is unadjusted (25(OH)D concentrations exposures are standardised for age and gender)

Model 2 same as Model 1 plus adjustment for ethnicity, head of household social class, mothers and partners education, time spent outdoors during summer (age 8.5 years), use of sunblock, hat, covering clothing, avoidance of midday sun, BMI and eligibility for free school meals

Model 3 same as Model 2 plus adjustment for serum concentrations of phosphate, albumin-adjusted calcium and parathyroid hormone)

**Supplementary Web-Table 7.** Sensitivity analyses: Prospective association of 25(OH)D<sub>3</sub>, 25(OH)D<sub>2</sub>, phosphate, calcium and PTH levels (assessed at mean age 10.1 years) with Key Stage 3 scores (assessed at age 13-14 years) (n=2576), with additional adjustment for IQ (measured at age 8.5 years)

| Exposure                 | Outcome             | SD change in outcome per doubling of exposure (95%CI) |                      |                      |                      |                      |
|--------------------------|---------------------|-------------------------------------------------------|----------------------|----------------------|----------------------|----------------------|
|                          |                     | Model 1                                               | Model 2              | Model 2+IQ           | Model 3              | Model 3+IQ           |
| 25(OH)D <sub>3</sub>     | English total score | 0.02 (-0.01, 0.04)                                    | 0.01 (-0.01, 0.03)   | 0.01 (-0.01, 0.04)   | 0.01 (-0.01, 0.03)   | 0.01 (-0.01, 0.03)   |
|                          | Maths total score   | 0.01 (-0.01, 0.03)                                    | 0.01 (-0.02, 0.03)   | 0.01 (-0.01, 0.03)   | 0.01 (-0.02, 0.03)   | 0.01 (-0.01, 0.03)   |
|                          | Science total score | 0.01 (-0.01, 0.03)                                    | 0.01 (-0.02, 0.03)   | 0.01 (-0.02, 0.03)   | 0.01 (-0.01, 0.03)   | 0.01 (-0.01, 0.03)   |
| 25(OH)D <sub>2</sub>     | English total score | -0.07 (-0.10, -0.04)                                  | -0.05 (-0.08, -0.02) | -0.05 (-0.09, -0.02) | -0.05 (-0.08, -0.02) | -0.05 (-0.08, -0.02) |
|                          | Maths total score   | 0.02 (-0.02, 0.05)                                    | 0.03 (-0.01, 0.07)   | 0.03 (-0.01, 0.06)   | 0.03 (-0.01, 0.06)   | 0.03 (-0.01, 0.06)   |
|                          | Science total score | -0.02 (-0.06, 0.02)                                   | -0.01 (-0.05, 0.03)  | -0.01 (-0.04, 0.02)  | -0.01 (-0.05, 0.03)  | -0.01 (-0.05, 0.02)  |
| Albumin-adjusted calcium | English total score | 0.00 (-0.02, 0.02)                                    | 0.01 (-0.01, 0.03)   | 0.01 (-0.01, 0.03)   | 0.01 (-0.01, 0.04)   | 0.02 (0.00, 0.04)    |
|                          | Maths total score   | 0.00 (-0.02, 0.03)                                    | 0.01 (-0.01, 0.03)   | 0.01 (-0.01, 0.03)   | 0.01 (-0.01, 0.03)   | 0.01 (-0.01, 0.03)   |
|                          | Science total score | 0.00 (-0.02, 0.03)                                    | 0.02 (-0.01, 0.04)   | 0.02 (0.00, 0.04)    | 0.01 (-0.01, 0.03)   | 0.01 (-0.01, 0.03)   |
| Phosphate                | English total score | 0.01 (-0.01, 0.03)                                    | 0.00 (-0.02, 0.02)   | 0.00 (-0.02, 0.02)   | 0.00 (-0.02, 0.02)   | 0.00 (-0.02, 0.02)   |
|                          | Maths total score   | 0.00 (-0.02, 0.02)                                    | 0.00 (-0.03, 0.02)   | -0.01 (-0.03, 0.02)  | -0.01 (-0.03, 0.02)  | -0.01 (-0.03, 0.01)  |
|                          | Science total score | 0.04 (0.02, 0.06)                                     | 0.03 (0.01, 0.05)    | 0.03 (0.01, 0.05)    | 0.03 (0.00, 0.05)    | 0.02 (0.00, 0.05)    |
| Parathyroid hormone      | English total score | -0.01 (-0.04, 0.01)                                   | -0.01 (-0.04, 0.01)  | -0.02 (-0.04, 0.00)  | -0.01 (-0.03, 0.01)  | -0.01 (-0.03, 0.01)  |
|                          | Maths total score   | 0.00 (-0.02, 0.03)                                    | 0.01 (-0.02, 0.03)   | 0.00 (-0.02, 0.03)   | 0.01 (-0.02, 0.03)   | 0.01 (-0.02, 0.03)   |



score

Science total

score

0.01 (-0.01, 0.04)

0.02 (-0.01, 0.04)

0.01 (-0.01, 0.03)

0.02 (-0.01, 0.04)

0.01 (-0.01, 0.03)

---

Model 1 is unadjusted (the exposures are standardised for age and gender and 25OHD<sub>3</sub> is adjusted for season and ethnicity)

Model 2 same as Model 1 plus adjustment for ethnicity, head of household social class, mothers and partners education, time spent outdoors during summer (age 8.5 years), use of sunblock, hat, covering clothing, avoidance of midday sun, BMI and eligibility for free school meals

Model 3 same as Model 2 plus adjustment for serum concentrations of other hormones/metabolites which are related 25(OH)D<sub>3</sub> homeostasis (eg. association of 25(OH)D<sub>3</sub> is adjusted for 25(OH)D<sub>2</sub>, phosphate, albumin-adjusted calcium and parathyroid hormone)

**Supplementary Web-Table 8.** Sensitivity analyses: Prospective association of 25(OH)D<sub>3</sub>, 25(OH)D<sub>2</sub>, phosphate, calcium and PTH levels (assessed at mean age 10.1 years) with Key Stage 4 educational attainment (age 15-16 years, n=2576), with additional adjustment for IQ (measured at age 8.5 years)

| Exposure                 | Outcome                         | Odds ratio per doubling of exposure (95% CI) |                   |                   |                   |                   |
|--------------------------|---------------------------------|----------------------------------------------|-------------------|-------------------|-------------------|-------------------|
|                          |                                 | Model 1                                      | Model 2           | Model 2+IQ        | Model 3           | Model 3+IQ        |
| 25(OH)D <sub>3</sub>     | Achieved 5 or more A*-C grades  | 1.04 (0.99, 1.11)                            | 1.03 (0.97, 1.11) | 1.04 (0.97, 1.11) | 1.04 (0.97, 1.10) | 1.04 (0.97, 1.11) |
|                          | Achieved 9 or more A*-A grades  | 1.04 (0.94, 1.13)                            | 1.04 (0.94, 1.16) | 1.04 (0.91, 1.17) | 1.04 (0.93, 1.17) | 1.03 (0.92, 1.17) |
|                          | Did not achieve any A*-C grades | 0.93 (0.79, 1.07)                            | 0.94 (0.81, 1.07) | 0.93 (0.78, 1.09) | 0.95 (0.82, 1.13) | 0.94 (0.79, 1.12) |
| 25(OH)D <sub>2</sub>     | Achieved 5 or more A*-C grades  | 0.87 (0.79, 0.95)                            | 0.87 (0.79, 0.96) | 0.86 (0.77, 0.95) | 0.87 (0.78, 0.97) | 0.85 (0.76, 0.94) |
|                          | Achieved 9 or more A*-A grades  | 0.92 (0.83, 1.00)                            | 0.87 (0.73, 1.03) | 0.89 (0.73, 1.10) | 0.87 (0.72, 1.04) | 0.88 (0.72, 1.07) |
|                          | Did not achieve any A*-C grades | 1.16 (1.02, 1.33)                            | 1.21 (0.97, 1.50) | 1.26 (1.01, 1.57) | 1.21 (0.97, 1.52) | 1.26 (1.00, 1.58) |
| Albumin-adjusted calcium | Achieved 5 or more A*-C grades  | 1.01 (0.95, 1.08)                            | 1.05 (0.99, 1.12) | 1.06 (0.99, 1.13) | 1.04 (0.97, 1.11) | 1.05 (0.98, 1.12) |
|                          | Achieved 9 or more A*-A grades  | 0.98 (0.89, 1.07)                            | 1.03 (0.92, 1.15) | 1.06 (0.94, 1.18) | 1.03 (0.93, 1.16) | 1.06 (0.94, 1.20) |
|                          | Did not achieve any A*-C grades | 0.99 (0.86, 1.14)                            | 0.95 (0.82, 1.12) | 0.95 (0.82, 1.12) | 0.92 (0.77, 1.09) | 0.92 (0.78, 1.10) |
| Phosphate                | Achieved 5 or more A*-C grades  | 1.07 (1.00, 1.14)                            | 1.06 (1.00, 1.13) | 1.06 (0.99, 1.14) | 1.06 (0.99, 1.13) | 1.06 (0.98, 1.13) |
|                          | Achieved 9 or more A*-A grades  | 1.04 (0.94, 1.16)                            | 1.02 (0.90, 1.13) | 1.02 (0.91, 1.15) | 1.01 (0.90, 1.13) | 1.00 (0.89, 1.12) |
|                          | Did not achieve any A*-C grades | 1.03 (0.91, 1.17)                            | 1.05 (0.91, 1.21) | 1.06 (0.91, 1.24) | 1.06 (0.90, 1.26) | 1.08 (0.92, 1.27) |
| Parathyroid hormone      | Achieved 5 or more A*-C grades  | 0.98 (0.93, 1.04)                            | 0.99 (0.93, 1.05) | 0.97 (0.91, 1.04) | 0.99 (0.93, 1.06) | 0.97 (0.91, 1.04) |
|                          | Achieved 9 or more A*-A grades  | 0.99 (0.90, 1.08)                            | 1.00 (0.90, 1.11) | 1.00 (0.89, 1.12) | 1.00 (0.90, 1.12) | 1.01 (0.90, 1.13) |
|                          | Did not achieve any A*-C grades | 1.08 (0.94, 1.24)                            | 1.07 (0.92, 1.24) | 1.08 (0.91, 1.28) | 1.04 (0.88, 1.22) | 1.07 (0.91, 1.26) |

Model 1 is unadjusted (the exposures are standardised for age and gender and 25OHD<sub>3</sub> is adjusted for season and ethnicity)

Model 2 same as Model 1 plus adjustment for ethnicity, head of household social class, mothers and partners education, time spent outdoors during summer (age 8.5 years), use of sunblock, hat, covering clothing, avoidance of midday sun, BMI and eligibility for free school meals

Model 3 same as Model 2 plus adjustment for serum concentrations of other hormones/metabolites which are related 25(OH)D<sub>3</sub> homeostasis (eg. association of 25(OH)D<sub>3</sub> is adjusted for 25(OH)D<sub>2</sub>, phosphate, albumin-adjusted calcium and parathyroid hormone)
